# Supplementary material
Source: Research Square preprint supplement (doi:10.21203/rs.3.rs-6968513/v1)
Supplement: Supplementary file 1 [file e7f83cfbfe9d2709f3be495a.pdf]

## Appendix 1: Questionnaire for the first round

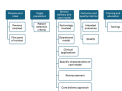

## eDelphi study: A taxonomy for Hospital at Home Care Model Classification

Dear participant,

"Hospital at home" (HaH) is a model of healthcare, where healthcare professionals actively treat patients in their homes for conditions that may otherwise require hospitalization. However, the lack of a standardized classification system has hindered systematic evaluation and comparison of these models. Taxonomies serve as classification systems that simplify complexity and enhance understanding within a specific domain. In previous work, we developed an initial draft of a taxonomy of HaH care models, aiming to categorize and compare the various ways HaH services are delivered as an alternative to traditional hospital care. The corresponding paper "Mapping the Landscape of Hospital at Home (HaH) Care: A Validated Taxonomy for HaH Care Model Classification" (Denecke K) has been accepted for publication by BMC Health Services Research and is in its initial version available as preprint: <https://www.researchsquare.com/article/rs-5338577/v1>. The taxonomy consists of 12 unique dimensions structured into 5 perspectives following the progression from triaging, through care delivery, operational processes, and metrics for success: Persons and roles (2 dimensions), Target population (1 dimension), Service delivery and care model (6 dimensions), outcomes and quality metrics (2 dimensions), and training and education (1 dimension).

By conducting an **eDelphi study**, we aim at collecting feedback from experts in the field of hospital at home care on the taxonomy and target at finding consensus on the dimensions and characteristics of the taxonomy. The underlying research question is: What are the characteristics of HaH care models?

By answering the questionnaire, you agree that you answers can be used in an anonymized and aggregated manner for describing the validation of the taxonomy.

The survey is structured as follows: After collecting some demographic data and information on your familiarity with HaH care, the survey will guide you through the taxonomy and asks you for feedback for the single characteristics. Filling the questionnaire will take approximately 30-45 minutes. If you are interested in the results or have questions, please contact [kerstin.denecke@bfh.ch](mailto:kerstin.denecke@bfh.ch)

Thanks a lot for your support!  
Kerstin Denecke, Bern University of Applied Sciences, Switzerland

\* Erforderlich

### Demographics

1. Please enter your e-mail address so that we can invite you for the follow-up rounds. It is possible to continue without, but then, we cannot invite you to the following rounds.

## 2. Gender \*

- ☐ Woman
- ☐ Man
- ☐ Non-binary
- ☐ Prefer not to say

## 3. Education / Background \*

- ☐ Computer Science / Engineering
- ☐ Health Informatics
- ☐ Medicine
- ☐ Nursing
- ☐ Physiotherapy
- ☐ Psychology / Mental Health
- ☐ Other Health Sciences
- ☐ Sociology
- ☐ Pharmacy
- ☐ Social work
- ☐ Other

## 4. Years of working experience \*

- ☐ < 5 years
- ☐ 5-10 years
- ☐ > 10 years

## 5. Sector you are currently working in \*

- ☐ Academia
- ☐ Industry
- ☐ Public health sector
- ☐ Private health sector
- ☐ Other

## 6. Continent where you are working currently \*

- ☐ Africa
- ☐ Asia
- ☐ Europe
- ☐ Australia and Oceania
- ☐ North America
- ☐ South America

## Your familiarity with HaH care

7. What is your understanding of the "Hospital at home" model of care? Please provide a brief explanation. \*

8. Please indicate to what extent you agree with the following statements. \*

|                                                                                   | Totally agree         | Partially agree       | Neither / Nor         | Partially disagree    | Totally disagree      |
|-----------------------------------------------------------------------------------|-----------------------|-----------------------|-----------------------|-----------------------|-----------------------|
| I am familiar with the concept of hospital at home care.                          | <input type="radio"/> |
| I developed a model of hospital at home care or participated in such development. | <input type="radio"/> |
| I delivered hospital at home care as a (health) professional.                     | <input type="radio"/> |

## Taxonomy perspective "Person and roles"

The perspective "Persons and roles" comprises two dimensions: Persons involved and First point of contact.

9. In the following, we list persons involved in delivering HaH care. Please indicate your degree of agreement with including them into the taxonomy. \*

|                                                                                        | Strongly agree        | Agree                 | Neither agree nor disagree | Disagree              | Strongly disagree     |
|----------------------------------------------------------------------------------------|-----------------------|-----------------------|----------------------------|-----------------------|-----------------------|
| Informal caregivers, relative, friends                                                 | <input type="radio"/> | <input type="radio"/> | <input type="radio"/>      | <input type="radio"/> | <input type="radio"/> |
| Healthcare providers (family doctor, specialist, clinician)                            | <input type="radio"/> | <input type="radio"/> | <input type="radio"/>      | <input type="radio"/> | <input type="radio"/> |
| Nurses                                                                                 | <input type="radio"/> | <input type="radio"/> | <input type="radio"/>      | <input type="radio"/> | <input type="radio"/> |
| Emergency department staff                                                             | <input type="radio"/> | <input type="radio"/> | <input type="radio"/>      | <input type="radio"/> | <input type="radio"/> |
| Paramedics                                                                             | <input type="radio"/> | <input type="radio"/> | <input type="radio"/>      | <input type="radio"/> | <input type="radio"/> |
| Social workers                                                                         | <input type="radio"/> | <input type="radio"/> | <input type="radio"/>      | <input type="radio"/> | <input type="radio"/> |
| Mental health support (psychologists, psychotherapists...)                             | <input type="radio"/> | <input type="radio"/> | <input type="radio"/>      | <input type="radio"/> | <input type="radio"/> |
| Rehabilitation staff (Physiotherapists, occupational therapists, speech therapists...) | <input type="radio"/> | <input type="radio"/> | <input type="radio"/>      | <input type="radio"/> | <input type="radio"/> |
| Pharmacists                                                                            | <input type="radio"/> | <input type="radio"/> | <input type="radio"/>      | <input type="radio"/> | <input type="radio"/> |
| Dietician                                                                              | <input type="radio"/> | <input type="radio"/> | <input type="radio"/>      | <input type="radio"/> | <input type="radio"/> |
| Technology-related staff                                                               | <input type="radio"/> | <input type="radio"/> | <input type="radio"/>      | <input type="radio"/> | <input type="radio"/> |

10. Do you suggest adding additional person groups? If so, please list them here.

11. In the following, we list possible characteristics for the dimension of "First point of contact", i.e. the first contact point that the patient is interacting with to decide on inclusion in a HaH care model. Please indicate your degree of agreement with including them into the taxonomy. \*

|                       | Strongly agree        | Agree                 | Neither agree nor disagree | Disagree              | Strongly disagree     |
|-----------------------|-----------------------|-----------------------|----------------------------|-----------------------|-----------------------|
| Emergency department  | <input type="radio"/> | <input type="radio"/> | <input type="radio"/>      | <input type="radio"/> | <input type="radio"/> |
| Hospital ward         | <input type="radio"/> | <input type="radio"/> | <input type="radio"/>      | <input type="radio"/> | <input type="radio"/> |
| Outpatient department | <input type="radio"/> | <input type="radio"/> | <input type="radio"/>      | <input type="radio"/> | <input type="radio"/> |
| Family doctor         | <input type="radio"/> | <input type="radio"/> | <input type="radio"/>      | <input type="radio"/> | <input type="radio"/> |
| Telephone triage      | <input type="radio"/> | <input type="radio"/> | <input type="radio"/>      | <input type="radio"/> | <input type="radio"/> |

12. Do you want to add additional items to the dimension "First point of contact"? Please list:

## Target population

The perspective Target population consists of one dimension, the "patient selection criteria". These are criteria checked before admitting a patient to HaH care and therefore focuses on the candidates' eligibility criteria for receiving HaH services.

13. In the following, we list patient selection criteria. Please indicate your degree of agreement with including them into the taxonomy. \*

|                            | Strongly agree        | Agree                 | Neither / nor         | Disagree              | Strongly disagree     |
|----------------------------|-----------------------|-----------------------|-----------------------|-----------------------|-----------------------|
| Medical condition          | <input type="radio"/> |
| Demographics               | <input type="radio"/> |
| Literacy level             | <input type="radio"/> |
| Social support             | <input type="radio"/> |
| Adequate living conditions | <input type="radio"/> |
| Clinical eligibility       | <input type="radio"/> |
| Technological readiness    | <input type="radio"/> |

14. Do you want to add additional items to the dimension "Patient selection criteria"? Please list:



## Service delivery and care model

The Service delivery and care model perspective aggregates 6 dimensions: "Technology involved", "Operational model", "Care delivery approach", "Clinical applications", "Specific characteristics of care model", and "Reimbursement".

15. In the following, we list technology involved in HaH care. Please indicate your degree of agreement with including them into the taxonomy. \*

|                                                                                    | Strongly agree        | Agree                 | Neither/nor           | Disagree              | Strongly disagree     |
|------------------------------------------------------------------------------------|-----------------------|-----------------------|-----------------------|-----------------------|-----------------------|
| Communication technology                                                           | <input type="radio"/> |
| Remote monitoring (e.g. wearables, sensors, Internet-of-Things technologies)       | <input type="radio"/> |
| Digital health tools for patients                                                  | <input type="radio"/> |
| Tablet/Laptop/P C provided for patient use                                         | <input type="radio"/> |
| Medical devices for treatment or diagnostics                                       | <input type="radio"/> |
| Electronic health records and documentation systems for patient data               | <input type="radio"/> |
| Data management tools                                                              | <input type="radio"/> |
| Assistive technologies for healthcare professionals (e.g. dashboard, alert system) | <input type="radio"/> |

16. Do you want to add additional items to the dimension "Technology involved"? Please list:

17. In the following, we list possible operational models of HaH care. Please indicate your degree of agreement with including them into the taxonomy. \*

|                              | Strongly agree        | Agree                 | Neither/nor           | Disagree              | Strongly disagree     |
|------------------------------|-----------------------|-----------------------|-----------------------|-----------------------|-----------------------|
| Hospital-managed             | <input type="radio"/> |
| Third-party provider managed | <input type="radio"/> |
| Insurance driven             | <input type="radio"/> |

18. Do you want to add additional items to the dimension "Operational models"? Please list:

19. In the following, we list clinical applications where HaH care models are used for. Please indicate your degree of agreement with including them into the taxonomy. \*

|                                        | Strongly agree        | Agree                 | Neither/nor           | Disagree              | Strongly disagree     |
|----------------------------------------|-----------------------|-----------------------|-----------------------|-----------------------|-----------------------|
| Post acute care                        | <input type="radio"/> |
| Prevention                             | <input type="radio"/> |
| Acute medical care                     | <input type="radio"/> |
| Continuous care for chronic conditions | <input type="radio"/> |
| Diagnostics                            | <input type="radio"/> |

20. Do you want to add additional items to the dimension "Clinical applications"? Please list:

21. In the following, we list specific characteristics of the HaH care model. Please indicate your degree of agreement with including them into the taxonomy. \*

|                             | Strongly agree        | Agree                 | Neither/nor           | Disagree              | Strongly disagree     |
|-----------------------------|-----------------------|-----------------------|-----------------------|-----------------------|-----------------------|
| Emergency handling in place | <input type="radio"/> |

22. Do you want to add additional items to the dimension "Specific characteristics of care model"? Please list:

23. In the following, we list reimbursement models of HaH care. Please indicate your degree of agreement with including them into the taxonomy. \*

|                           | Strongly agree        | Agree                 | Neither/nor           | Disagree              | Strongly disagree     |
|---------------------------|-----------------------|-----------------------|-----------------------|-----------------------|-----------------------|
| Health insurance coverage | <input type="radio"/> |
| Bundled payments          | <input type="radio"/> |

24. Do you want to add additional items to the dimension "Reimbursement models"? Please list:

25. In the following, we list care delivery approaches of HaH care. Please indicate your degree of agreement with including them into the taxonomy. \*

|                                                      | Strongly agree        | Agree                 | Neither/nor           | Disagree              | Strongly disagree     |
|------------------------------------------------------|-----------------------|-----------------------|-----------------------|-----------------------|-----------------------|
| In-person care                                       | <input type="radio"/> |
| Telemedicine care                                    | <input type="radio"/> |
| Telemonitoring                                       | <input type="radio"/> |
| Hybrid care (any combination of the above mentioned) | <input type="radio"/> |

26. Do you want to add additional items to the dimension "Care delivery approaches"? Please list:

## Outcome and quality metrics

The Outcomes and quality metrics perspective encompasses the "Intended outcomes / purpose" dimension and the "Quality/Outcome metrics" dimension.

27. In the following, we list intended outcomes or purposes of HaH care. Please indicate your degree of agreement with including them into the taxonomy. \*

|                                | Strongly agree        | Agree                 | Neither/nor           | Disagree              | Strongly disagree     |
|--------------------------------|-----------------------|-----------------------|-----------------------|-----------------------|-----------------------|
| Early discharge                | <input type="radio"/> |
| Avoidance of admission         | <input type="radio"/> |
| Improving care outcomes        | <input type="radio"/> |
| Economic efficiency of care    | <input type="radio"/> |
| Improving patient safety       | <input type="radio"/> |
| Improving patient satisfaction | <input type="radio"/> |
| Optimize resource utilization  | <input type="radio"/> |

28. Do you want to add additional items to the dimension "Intended outcomes"? Please list:

29. In the following, we list quality or outcome metrics that have been applied to measure quality of HaH care models. Please indicate your degree of agreement with including them into the taxonomy. \*

|                                                | Strongly agree        | Agree                 | Neither/nor           | Disagree              | Strongly disagree     |
|------------------------------------------------|-----------------------|-----------------------|-----------------------|-----------------------|-----------------------|
| Effectiveness                                  | <input type="radio"/> |
| Mortality rate                                 | <input type="radio"/> |
| Readmission rate                               | <input type="radio"/> |
| Number of adverse events                       | <input type="radio"/> |
| Emergency department usage                     | <input type="radio"/> |
| Services received                              | <input type="radio"/> |
| Occurrence of infections                       | <input type="radio"/> |
| Falls incidents                                | <input type="radio"/> |
| Health-related quality of life                 | <input type="radio"/> |
| Patient satisfaction                           | <input type="radio"/> |
| Patient safety                                 | <input type="radio"/> |
| Patient acceptability                          | <input type="radio"/> |
| Provider satisfaction                          | <input type="radio"/> |
| Reduction of workload for healthcare providers | <input type="radio"/> |
| Kilogram CO2 saved                             | <input type="radio"/> |
| Travel times saved                             | <input type="radio"/> |
| Cost effectiveness                             | <input type="radio"/> |
| Duration of the intervention                   | <input type="radio"/> |
| Prescription of drugs                          | <input type="radio"/> |

30. Do you want to add additional items to the dimension "Quality and outcome metrics"? Please list:

## Training and education

31. In the following, we list training measurements involved in the context of delivering HaH care.  
Please indicate your degree of agreement with including them into the taxonomy. \*

|                             | Strongly agree        | Agree                 | Neither/nor           | Disagree              | Strongly disagree     |
|-----------------------------|-----------------------|-----------------------|-----------------------|-----------------------|-----------------------|
| Patient education           | <input type="radio"/> |
| Informal caregiver training | <input type="radio"/> |
| Staff training              | <input type="radio"/> |

32. Do you want to add additional items to the dimension "Training measurements"? Please list:

## Final remarks

Thanks for your participation. You will be contacted for the next round. If you have any questions, feel free to contact: [kerstin-denecke@bfh.ch](mailto:kerstin-denecke@bfh.ch)

33. When you have any other comments on the taxonomy, please let us know.

---

Dieser Inhalt wurde von Microsoft weder erstellt noch gebilligt. Die von Ihnen übermittelten Daten werden an den Formulareigentümer gesendet.

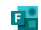

Microsoft Forms



## Appendix 2: Results obtained in the last round

| Perspective: Outcome and quality metrics |                           |                                                       |           |
|------------------------------------------|---------------------------|-------------------------------------------------------|-----------|
| Dimension: Intended outcome / purpose    |                           |                                                       |           |
| Characteristics                          | Consent (C) / Dissent (D) | % of important or very important (rank 4 or 5) scores | Stability |
| Improving patient satisfaction*          | C                         | 95.0                                                  |           |
| Avoidance of admission*                  | C                         | 90.0                                                  |           |
| Economic efficiency of care*             | C                         | 90.0                                                  |           |
| Optimize resource utilization*           | C                         | 90.0                                                  |           |
| Improving care outcomes                  | C                         | 87.5                                                  | Y         |
| Improving patient safety                 | C                         | 87.5                                                  | Y         |
| Early discharge*                         | C                         | 85.0                                                  |           |
| Dimension: Quality / outcome metrics     |                           |                                                       |           |
| Characteristics                          | Consent (C) / Dissent (D) | % of important or very important (rank 4 or 5) scores | Stability |
| Health-related quality of life           | C                         | 100                                                   | Y         |
| Readmission rate*                        | C                         | 100                                                   |           |
| Effectiveness*                           | C                         | 95.0                                                  |           |
| Emergency department usage*              | C                         | 95.0                                                  |           |
| Mortality rate*                          | C                         | 95.0                                                  |           |
| Number of adverse events*                | C                         | 95.0                                                  |           |

|                                                        |                                      |                                                                      |                  |
|--------------------------------------------------------|--------------------------------------|----------------------------------------------------------------------|------------------|
| Patient acceptability*                                 | C                                    | 95.0                                                                 |                  |
| Patient safety*                                        | C                                    | 95.0                                                                 |                  |
| Patient satisfaction*                                  | C                                    | 95.0                                                                 |                  |
| Cost effectiveness                                     | C                                    | 93.8                                                                 | Y                |
| Provider satisfaction                                  | C                                    | 93.8                                                                 | Y                |
| Services received (including answered telephone calls) | C                                    | 93.8                                                                 | Y                |
| Duration of the intervention                           | C                                    | 87.5                                                                 | Y                |
| Occurrence of infections                               | C                                    | 81.3                                                                 | Y                |
| Falls incidents                                        | D                                    | 75.0                                                                 | Y                |
| Travel times saved                                     | D                                    | 75.0                                                                 | Y                |
| Prescription of drugs                                  | D                                    | 62.5                                                                 | Y                |
| Reduction of workload for healthcare providers         | D                                    | 62.5                                                                 | Y                |
| Kilogram CO2 saved                                     | D                                    | 50.0                                                                 | Y                |
| <b>Perspective: Persons and roles</b>                  |                                      |                                                                      |                  |
| <b>Dimension: First point of care</b>                  |                                      |                                                                      |                  |
| <b>Characteristics</b>                                 | <b>Consent (C) /<br/>Dissent (D)</b> | <b>% of important or very<br/>important (rank 4 or 5)<br/>scores</b> | <b>Stability</b> |
| Medical specialist / specialist clinic                 | C                                    | 100                                                                  | Y                |
| Hospital ward*                                         | C                                    | 95.0                                                                 |                  |
| Family doctor                                          | C                                    | 93.8                                                                 | Y                |

|                                                                                        |                                  |                                                              |                  |
|----------------------------------------------------------------------------------------|----------------------------------|--------------------------------------------------------------|------------------|
| Outpatient department                                                                  | C                                | 87.5                                                         | Y                |
| Emergency department*                                                                  | C                                | 85.0                                                         |                  |
| Day hospital                                                                           | C                                | 81.3                                                         | Y                |
| Community healthcare staff (e.g. community specialty nurses like heart failure nurses) | D                                | 75.0                                                         | Y                |
| Nursing home                                                                           | D                                | 68.8                                                         | Y                |
| Telephone triage                                                                       | C                                | 50.0                                                         | Y                |
| Ambulance service                                                                      | D                                | 43.8                                                         | Y                |
| <b>Dimension: Person</b>                                                               |                                  |                                                              |                  |
| <b>Characteristics</b>                                                                 | <b>Consent (C) / Dissent (D)</b> | <b>% of important or very important (rank 4 or 5) scores</b> | <b>Stability</b> |
| Healthcare providers (family doctor, specialist, clinician)*                           | C                                | 100                                                          |                  |
| Nurses*                                                                                | C                                | 100                                                          |                  |
| Pharmacists                                                                            | C                                | 100                                                          | Y                |
| Rehabilitation staff (Physiotherapists, occupational therapists...)                    | C                                | 100                                                          | Y                |
| Non-medical support services (e.g. administrative personnel...)                        | C                                | 87.5                                                         | Y                |
| Social workers                                                                         | C                                | 87.5                                                         | Y                |
| Imaging support                                                                        | C                                | 81.3                                                         | Y                |
| Laboratory support                                                                     | C                                | 81.3                                                         | Y                |
| Informal caregivers, relatives, friends                                                | D                                | 75.0                                                         | Y                |
| Dietician                                                                              | D                                | 62.5                                                         | Y                |
| Paramedics                                                                             | D                                | 62.5                                                         | Y                |

|                                                                              |                                      |                                                                      |                  |
|------------------------------------------------------------------------------|--------------------------------------|----------------------------------------------------------------------|------------------|
| Emergency                                                                    | D                                    | 56.3                                                                 | Y                |
| Mental health support<br>(psychologists,<br>psychotherapists...)             | C                                    | 50.0                                                                 | Y                |
| <b>Perspective: Service delivery and care model</b>                          |                                      |                                                                      |                  |
| <b>Dimension: Care delivery approach</b>                                     |                                      |                                                                      |                  |
| <b>Characteristics</b>                                                       | <b>Consent (C) /<br/>Dissent (D)</b> | <b>% of important or very<br/>important (rank 4 or 5)<br/>scores</b> | <b>Stability</b> |
| In-person care*                                                              | C                                    | 100                                                                  |                  |
| Hybrid care (any combination of<br>the above mentioned)*                     | C                                    | 95.0                                                                 |                  |
| Telemedicine care                                                            | C                                    | 87.5                                                                 | Y                |
| Telemonitoring                                                               | C                                    | 87.5                                                                 | Y                |
| <b>Dimension: Clinical applications</b>                                      |                                      |                                                                      |                  |
| <b>Characteristics</b>                                                       | <b>Consent (C) /<br/>Dissent (D)</b> | <b>% of important or very<br/>important (rank 4 or 5)<br/>scores</b> | <b>Stability</b> |
| Acute medical care*                                                          | C                                    | 90.0                                                                 |                  |
| Post acute care (e.g.<br>physiotherapy at home or<br>rehabilitation at home) | D                                    | 56.3                                                                 | Y                |
| Prevention (including prevention<br>of worsening of a medical<br>condition)  | D                                    | 37.5                                                                 | Y                |
| Continuous care for chronic<br>conditions                                    | D                                    | 31.3                                                                 | Y                |
| Diagnostics                                                                  | D                                    | 31.3                                                                 | Y                |
| <b>Dimension: Operational model</b>                                          |                                      |                                                                      |                  |
| <b>Characteristics</b>                                                       | <b>Consent (C) /<br/>Dissent (D)</b> | <b>% of important or very<br/>important (rank 4 or 5)<br/>scores</b> | <b>Stability</b> |
| Hospital-managed*                                                            | C                                    | 100                                                                  |                  |

|                                                                                    |                                  |                                                              |                  |
|------------------------------------------------------------------------------------|----------------------------------|--------------------------------------------------------------|------------------|
| Insurance driven (e.g. organized by Medicaid in the U.S.)                          | D                                | 56.3                                                         | Y                |
| Third-party provider managed                                                       | D                                | 56.3                                                         | Y                |
| <b>Dimension: Technology involved</b>                                              |                                  |                                                              |                  |
| <b>Characteristics</b>                                                             | <b>Consent (C) / Dissent (D)</b> | <b>% of important or very important (rank 4 or 5) scores</b> | <b>Stability</b> |
| Communication technology*                                                          | C                                | 95.0                                                         |                  |
| Assistive technologies for healthcare professionals (e.g. dashboard, alert system) | C                                | 87.5                                                         | Y                |
| Electronic health records and documentation systems for patient data               | C                                | 87.5                                                         | Y                |
| Medical devices for treatment or diagnostics (including medication dispensers)     | C                                | 87.5                                                         | Y                |
| Remote monitoring (e.g. wearables, sensors, Internet-of-Things technologies)       | C                                | 87.5                                                         | N                |
| Digital health tools for patients                                                  | D                                | 75.0                                                         | Y                |
| Data management tools                                                              | D                                | 68.8                                                         | Y                |
| Tablet/Laptop/PC provided for patient/relative/caregiver use                       | D                                | 68.8                                                         | Y                |
| <b>Dimension: Reimbursement</b>                                                    |                                  |                                                              |                  |
| <b>Characteristics</b>                                                             | <b>Consent (C) / Dissent (D)</b> | <b>% of important or very important (rank 4 or 5) scores</b> | <b>Stability</b> |
| Health insurance coverage                                                          | C                                | 81.3                                                         | Y                |
| Integrated with inpatient reimbursement model                                      | C                                | 81.3                                                         | Y                |
| Bundled payments                                                                   | D                                | 62.5                                                         | Y                |
| Outpatient-based reimbursement model                                               | D                                | 37.5                                                         | Y                |

| Community-based reimbursement model                                                  | D                         | 25.0                                                  | Y         |
|--------------------------------------------------------------------------------------|---------------------------|-------------------------------------------------------|-----------|
| <b>Perspective: Target population</b>                                                |                           |                                                       |           |
| <b>Dimension: Patient selection criteria</b>                                         |                           |                                                       |           |
| Characteristics                                                                      | Consent (C) / Dissent (D) | % of important or very important (rank 4 or 5) scores | Stability |
| Clinical eligibility*                                                                | C                         | 100                                                   |           |
| Medical condition*                                                                   | C                         | 100                                                   |           |
| Patient preference                                                                   | C                         | 100                                                   | Y         |
| Basic safety conditions at home (e.g. running water, hygiene)                        | C                         | 93.8                                                  | Y         |
| Adequate living conditions (e.g. distance to hospital, informal caregiver available) | C                         | 87.5                                                  | N         |
| Demographics                                                                         | C                         | 87.5                                                  | N         |
| Informal caregiver willingness                                                       | C                         | 87.5                                                  | Y         |
| Social support                                                                       | C                         | 81.3                                                  | Y         |
| Common language between patient and HaH care team                                    | D                         | 75.0                                                  | Y         |
| Literacy level                                                                       | C                         | 75.0                                                  | N         |
| Informal caregiver skills                                                            | D                         | 68.8                                                  | N         |
| Technological readiness                                                              | C                         | 62.5                                                  | Y         |
| Appropriate insurance model                                                          | D                         | 56.3                                                  | Y         |
| <b>Perspective: Training and education</b>                                           |                           |                                                       |           |
| <b>Dimension: Training measurements</b>                                              |                           |                                                       |           |
| Characteristics                                                                      | Consent (C) / Dissent (D) | % of important or very important (rank 4 or 5) scores | Stability |
| Staff training*                                                                      | C                         | 100                                                   |           |
| Patient education                                                                    | C                         | 93.8                                                  | Y         |

|                             |   |      |   |
|-----------------------------|---|------|---|
| Informal caregiver training | C | 87.5 | Y |
|-----------------------------|---|------|---|

\*These characteristics obtained a strong agreement in round 1.

## Appendix 3: Results of each round

### Round 1

| Perspective: Outcome and quality metrics |         |      |                           |                                                       |
|------------------------------------------|---------|------|---------------------------|-------------------------------------------------------|
| Dimension: Intended outcome / purpose    |         |      |                           |                                                       |
| Characteristics                          | Average | IQR  | Consent (C) / Dissent (D) | % of important or very important (rank 4 or 5) scores |
| Improving patient satisfaction           | 4.8     | 0    | C                         | 95.0                                                  |
| Improving care outcomes                  | 4.7     | 0.25 | C                         | 95.0                                                  |
| Economic efficiency of care              | 4.7     | 0    | C                         | 90.0                                                  |
| Optimize resource utilization            | 4.7     | 0    | C                         | 90.0                                                  |
| Avoidance of admission                   | 4.6     | 0    | C                         | 90.0                                                  |
| Early discharge                          | 4.5     | 0    | C                         | 85.0                                                  |
| Improving patient safety                 | 4.4     | 1    | C                         | 80.0                                                  |
| Dimension: Quality / outcome metrics     |         |      |                           |                                                       |
| Characteristics                          | Average | IQR  | Consent (C) / Dissent (D) | % of important or very important (rank 4 or 5) scores |
| Readmission rate                         | 4.9     | 0    | C                         | 100                                                   |
| Effectiveness                            | 4.9     | 0    | C                         | 95.0                                                  |
| Patient satisfaction                     | 4.9     | 0    | C                         | 95.0                                                  |



|                                                        |                |            |                                  |                                                              |
|--------------------------------------------------------|----------------|------------|----------------------------------|--------------------------------------------------------------|
| Emergency department usage                             | 4.8            | 0          | C                                | 95.0                                                         |
| Mortality rate                                         | 4.8            | 0          | C                                | 95.0                                                         |
| Number of adverse events                               | 4.8            | 0          | C                                | 95.0                                                         |
| Patient acceptability                                  | 4.8            | 0          | C                                | 95.0                                                         |
| Patient safety                                         | 4.8            | 0          | C                                | 95.0                                                         |
| Provider satisfaction                                  | 4.7            | 1          | C                                | 100                                                          |
| Cost effectiveness                                     | 4.7            | 1          | C                                | 95.0                                                         |
| Occurrence of infections                               | 4.7            | 1          | C                                | 95.0                                                         |
| Health-related quality of life                         | 4.6            | 1          | C                                | 95.0                                                         |
| Falls incidents                                        | 4.5            | 1          | C                                | 85.0                                                         |
| Services received (including answered telephone calls) | 4.5            | 1          | C                                | 85.0                                                         |
| Duration of the intervention                           | 4.4            | 1          | C                                | 80.0                                                         |
| Prescription of drugs                                  | 4.1            | 2          | D                                | 75.0                                                         |
| Reduction of workload for healthcare providers         | 3.9            | 2          | D                                | 55.0                                                         |
| Travel times saved                                     | 3.8            | 2          | D                                | 60.0                                                         |
| Kilogram CO2 saved                                     | 3.1            | 2          | D                                | 45.0                                                         |
| <b>Perspective: Persons and roles</b>                  |                |            |                                  |                                                              |
| <b>Dimension: First point of care</b>                  |                |            |                                  |                                                              |
| <b>Characteristics</b>                                 | <b>Average</b> | <b>IQR</b> | <b>Consent (C) / Dissent (D)</b> | <b>% of important or very important (rank 4 or 5) scores</b> |

|                                                                           |                |            |                                      |                                                                      |
|---------------------------------------------------------------------------|----------------|------------|--------------------------------------|----------------------------------------------------------------------|
| Hospital ward                                                             | 4.7            | 0          | C                                    | 95.0                                                                 |
| Outpatient department                                                     | 4.6            | 1          | C                                    | 90.0                                                                 |
| Emergency department                                                      | 4.6            | 0          | C                                    | 85.0                                                                 |
| Family doctor                                                             | 4.6            | 1          | C                                    | 85.0                                                                 |
| Telephone triage                                                          | 3.6            | 2.25       | D                                    | 45.0                                                                 |
| <b>Dimension: Person</b>                                                  |                |            |                                      |                                                                      |
| <b>Characteristics</b>                                                    | <b>Average</b> | <b>IQR</b> | <b>Consent (C) /<br/>Dissent (D)</b> | <b>% of important or<br/>very important (rank<br/>4 or 5) scores</b> |
| Healthcare providers (family<br>doctor, specialist, clinician)            | 5.0            | 0          | C                                    | 100                                                                  |
| Nurses                                                                    | 5.0            | 0          | C                                    | 100                                                                  |
| Pharmacists                                                               | 4.6            | 1          | C                                    | 95.0                                                                 |
| Rehabilitation staff<br>(Physiotherapists,<br>occupational therapists...) | 4.3            | 1          | C                                    | 80.0                                                                 |
| Social workers                                                            | 4.1            | 1.25       | D                                    | 75.0                                                                 |
| Technology-related staff                                                  | 4.0            | 2          | D                                    | 70.0                                                                 |
| Dietician                                                                 | 3.8            | 1          | C                                    | 70.0                                                                 |
| Mental health support<br>(psychologists,<br>psychotherapists...)          | 3.7            | 2          | D                                    | 50.0                                                                 |
| Paramedics                                                                | 3.7            | 2          | D                                    | 50.0                                                                 |
| Emergency department                                                      | 3.3            | 2.25       | D                                    | 50.0                                                                 |
| <b>Perspective: Service delivery and care model</b>                       |                |            |                                      |                                                                      |
| <b>Dimension: Care delivery approach</b>                                  |                |            |                                      |                                                                      |
| <b>Characteristics</b>                                                    | <b>Average</b> | <b>IQR</b> | <b>Consent (C) /<br/>Dissent (D)</b> | <b>% of important or<br/>very important (rank<br/>4 or 5) scores</b> |

|                                                                        |                |            |                                  |                                                              |
|------------------------------------------------------------------------|----------------|------------|----------------------------------|--------------------------------------------------------------|
| In-person care                                                         | 5.0            | 0          | C                                | 100                                                          |
| Hybrid care (any combination of the above mentioned)                   | 4.9            | 0          | C                                | 95.0                                                         |
| Telemonitoring                                                         | 4.3            | 1          | C                                | 80.0                                                         |
| Telemedicine care                                                      | 4.2            | 1.25       | D                                | 75.0                                                         |
| <b>Dimension: Clinical applications</b>                                |                |            |                                  |                                                              |
| <b>Characteristics</b>                                                 | <b>Average</b> | <b>IQR</b> | <b>Consent (C) / Dissent (D)</b> | <b>% of important or very important (rank 4 or 5) scores</b> |
| Acute medical care                                                     | 4.6            | 0          | C                                | 90.0                                                         |
| Post acute care (e.g. physiotherapy at home or rehabilitation at home) | 4.4            | 1.25       | D                                | 75.0                                                         |
| Continuous care for chronic conditions                                 | 3.2            | 2.25       | D                                | 50.0                                                         |
| Diagnostics                                                            | 3.0            | 2          | D                                | 35.0                                                         |
| Prevention (including prevention of worsening of a medical condition)  | 2.8            | 2          | D                                | 30.0                                                         |
| <b>Dimension: Operational model</b>                                    |                |            |                                  |                                                              |
| <b>Characteristics</b>                                                 | <b>Average</b> | <b>IQR</b> | <b>Consent (C) / Dissent (D)</b> | <b>% of important or very important (rank 4 or 5) scores</b> |
| Hospital-managed                                                       | 5.0            | 0          | C                                | 100                                                          |
| Third-party provider managed                                           | 3.0            | 2          | D                                | 40.0                                                         |
| Insurance driven (e.g. organized by Medicaid in the U.S.)              | 2.8            | 2.25       | D                                | 30.0                                                         |
| <b>Dimension: Technology involved</b>                                  |                |            |                                  |                                                              |
| <b>Characteristics</b>                                                 | <b>Average</b> | <b>IQR</b> | <b>Consent (C) / Dissent (D)</b> | <b>% of important or very important (rank</b>                |

|                                                                                    |                |            |                                  |                                                              |
|------------------------------------------------------------------------------------|----------------|------------|----------------------------------|--------------------------------------------------------------|
|                                                                                    |                |            |                                  | <b>4 or 5) scores</b>                                        |
| Communication technology                                                           | 4.8            | 0          | C                                | 95.0                                                         |
| Electronic health records and documentation systems for patient data               | 4.7            | 0.25       | C                                | 90.0                                                         |
| Medical devices for treatment or diagnostics (including medication dispensers)     | 4.6            | 0.25       | C                                | 85.0                                                         |
| Remote monitoring (e.g. wearables, sensors, Internet-of-Things technologies)       | 4.4            | 1          | C                                | 85.0                                                         |
| Assistive technologies for healthcare professionals (e.g. dashboard, alert system) | 4.4            | 1          | C                                | 80.0                                                         |
| Data management tools                                                              | 4.4            | 1          | C                                | 80.0                                                         |
| Digital health tools for patients                                                  | 4.0            | 2          | D                                | 65.0                                                         |
| Tablet/Laptop/PC provided for patient/relative/caregiver use                       | 3.8            | 2          | D                                | 60.0                                                         |
| <b>Dimension: Reimbursement</b>                                                    |                |            |                                  |                                                              |
| <b>Characteristics</b>                                                             | <b>Average</b> | <b>IQR</b> | <b>Consent (C) / Dissent (D)</b> | <b>% of important or very important (rank 4 or 5) scores</b> |
| Health insurance coverage                                                          | 4.1            | 2          | D                                | 65.0                                                         |
| Bundled payments                                                                   | 3.3            | 1.25       | D                                | 40.0                                                         |
| <b>Perspective: Target population</b>                                              |                |            |                                  |                                                              |
| <b>Dimension: Patient selection criteria</b>                                       |                |            |                                  |                                                              |
| <b>Characteristics</b>                                                             | <b>Average</b> | <b>IQR</b> | <b>Consent (C) / Dissent (D)</b> | <b>% of important or very important (rank 4 or 5) scores</b> |
| Clinical eligibility                                                               | 5.0            | 0          | C                                | 100                                                          |

|                                                                                            |                |            |                                      |                                                                      |
|--------------------------------------------------------------------------------------------|----------------|------------|--------------------------------------|----------------------------------------------------------------------|
| Medical condition                                                                          | 5.0            | 0          | C                                    | 100                                                                  |
| Adequate living conditions<br>(e.g. distance to hospital,<br>informal caregiver available) | 4.2            | 1          | C                                    | 80.0                                                                 |
| Social support                                                                             | 4.2            | 1          | C                                    | 80.0                                                                 |
| Demographics                                                                               | 4.0            | 2          | D                                    | 70.0                                                                 |
| Literacy level                                                                             | 3.2            | 2          | D                                    | 45.0                                                                 |
| Technological readiness                                                                    | 3.1            | 2          | D                                    | 50.0                                                                 |
| <b>Perspective: Training and education</b>                                                 |                |            |                                      |                                                                      |
| <b>Dimension: Training measurements</b>                                                    |                |            |                                      |                                                                      |
| <b>Characteristics</b>                                                                     | <b>Average</b> | <b>IQR</b> | <b>Consent (C) /<br/>Dissent (D)</b> | <b>% of important or<br/>very important (rank<br/>4 or 5) scores</b> |
| Staff training                                                                             | 4.9            | 0          | C                                    | 100                                                                  |
| Patient education                                                                          | 4.8            | 0.25       | C                                    | 100                                                                  |
| Informal caregiver training                                                                | 4.5            | 1          | C                                    | 95.0                                                                 |

Table 2: Results obtained in round 1.

## Round 2

|                                                 |                |            |                                      |                                                                      |
|-------------------------------------------------|----------------|------------|--------------------------------------|----------------------------------------------------------------------|
| <b>Perspective: Outcome and quality metrics</b> |                |            |                                      |                                                                      |
| <b>Dimension: Intended outcome / purpose</b>    |                |            |                                      |                                                                      |
| <b>Characteristics</b>                          | <b>Average</b> | <b>IQR</b> | <b>Consent (C) /<br/>Dissent (D)</b> | <b>% of important or<br/>very important (rank<br/>4 or 5) scores</b> |
| Improving care outcomes                         | 4.4            | 1.25       | D                                    | 75.0                                                                 |
| Improving patient safety                        | 4.4            | 1.25       | D                                    | 75.0                                                                 |
| <b>Dimension: Quality / outcome metrics</b>     |                |            |                                      |                                                                      |

| Characteristics                                           | Average | IQR  | Consent (C) /<br>Dissent (D) | % of important or<br>very important (rank<br>4 or 5) scores |
|-----------------------------------------------------------|---------|------|------------------------------|-------------------------------------------------------------|
| Cost effectiveness                                        | 4.8     | 0.25 | C                            | 100                                                         |
| Health-related quality of life                            | 4.6     | 1    | C                            | 93.8                                                        |
| Occurrence of infections                                  | 4.4     | 1    | C                            | 87.5                                                        |
| Provider satisfaction                                     | 4.4     | 1    | C                            | 81.3                                                        |
| Duration of the intervention                              | 4.1     | 2    | D                            | 68.8                                                        |
| Falls incidents                                           | 4.1     | 2    | D                            | 68.8                                                        |
| Services received (including<br>answered telephone calls) | 3.9     | 2.25 | D                            | 68.8                                                        |
| Prescription of drugs                                     | 3.8     | 2    | D                            | 68.8                                                        |
| Reduction of workload for<br>healthcare providers         | 3.8     | 2    | D                            | 56.3                                                        |
| Travel times saved                                        | 3.6     | 1.5  | D                            | 62.5                                                        |
| Kilogram CO2 saved                                        | 3.4     | 1.5  | D                            | 50.0                                                        |
| <b>Perspective: Persons and roles</b>                     |         |      |                              |                                                             |
| <b>Dimension: First point of care</b>                     |         |      |                              |                                                             |
| Characteristics                                           | Average | IQR  | Consent (C) /<br>Dissent (D) | % of important or<br>very important (rank<br>4 or 5) scores |
| Family doctor                                             | 4.6     | 1    | C                            | 87.5                                                        |
| Day hospital                                              | 4.3     | 1    | C                            | 81.3                                                        |
| Outpatient department                                     | 4.3     | 1    | C                            | 81.3                                                        |

|                                                                                                                                                                                   |                |            |                                      |                                                                      |
|-----------------------------------------------------------------------------------------------------------------------------------------------------------------------------------|----------------|------------|--------------------------------------|----------------------------------------------------------------------|
| Nursing home                                                                                                                                                                      | 4.0            | 2          | D                                    | 68.8                                                                 |
| Community healthcare staff<br>(e.g. community specialty<br>nurses like heart failure<br>nurses)                                                                                   | 3.8            | 2          | D                                    | 62.5                                                                 |
| Ambulance service                                                                                                                                                                 | 3.5            | 3          | D                                    | 50.0                                                                 |
| Telephone triage                                                                                                                                                                  | 3.1            | 2.25       | D                                    | 37.5                                                                 |
| <b>Dimension: Person</b>                                                                                                                                                          |                |            |                                      |                                                                      |
| <b>Characteristics</b>                                                                                                                                                            | <b>Average</b> | <b>IQR</b> | <b>Consent (C) /<br/>Dissent (D)</b> | <b>% of important or<br/>very important (rank<br/>4 or 5) scores</b> |
| Pharmacists                                                                                                                                                                       | 4.4            | 1          | C                                    | 87.5                                                                 |
| Rehabilitation staff<br>(Physiotherapists,<br>occupational therapists...)                                                                                                         | 4.4            | 1          | C                                    | 87.5                                                                 |
| Non-medical support<br>services (e.g. administrative<br>personnel, technology-<br>related staff, managers,<br>regulatory /legal officers,<br>billers, transportation<br>services) | 4.3            | 1          | C                                    | 87.5                                                                 |
| Informal caregivers,<br>relatives, friends                                                                                                                                        | 4.2            | 1.25       | D                                    | 75.0                                                                 |
| Social workers                                                                                                                                                                    | 4.1            | 1          | C                                    | 81.3                                                                 |
| Imaging support                                                                                                                                                                   | 4.1            | 2          | D                                    | 68.8                                                                 |
| Laboratory support                                                                                                                                                                | 3.9            | 2          | D                                    | 62.5                                                                 |
| Dietician                                                                                                                                                                         | 3.8            | 1          | C                                    | 62.5                                                                 |
| Emergency department staff<br>(e.g. in-hospital and extra-<br>hospital)                                                                                                           | 3.4            | 3          | D                                    | 56.3                                                                 |
| Paramedics                                                                                                                                                                        | 3.2            | 2          | D                                    | 43.8                                                                 |
| Mental health support                                                                                                                                                             | 3.1            | 2          | D                                    | 31.3                                                                 |

|                                                                        |                |            |                                  |                                                              |
|------------------------------------------------------------------------|----------------|------------|----------------------------------|--------------------------------------------------------------|
| (psychologists, psychotherapists...)                                   |                |            |                                  |                                                              |
| <b>Perspective: Service delivery and care model</b>                    |                |            |                                  |                                                              |
| <b>Dimension: Care delivery approach</b>                               |                |            |                                  |                                                              |
| <b>Characteristics</b>                                                 | <b>Average</b> | <b>IQR</b> | <b>Consent (C) / Dissent (D)</b> | <b>% of important or very important (rank 4 or 5) scores</b> |
| Telemonitoring                                                         | 3.9            | 1.25       | D                                | 75.0                                                         |
| Telemedicine care                                                      | 3.8            | 1.25       | D                                | 75.0                                                         |
| <b>Dimension: Clinical applications</b>                                |                |            |                                  |                                                              |
| <b>Characteristics</b>                                                 | <b>Average</b> | <b>IQR</b> | <b>Consent (C) / Dissent (D)</b> | <b>% of important or very important (rank 4 or 5) scores</b> |
| Post acute care (e.g. physiotherapy at home or rehabilitation at home) | 3.7            | 2.25       | D                                | 62.5                                                         |
| Diagnostics                                                            | 2.9            | 2          | D                                | 37.5                                                         |
| Prevention (including prevention of worsening of a medical condition)  | 2.8            | 3          | D                                | 43.8                                                         |
| Continuous care for chronic conditions                                 | 2.7            | 3          | D                                | 43.8                                                         |
| <b>Dimension: Operational model</b>                                    |                |            |                                  |                                                              |
| <b>Characteristics</b>                                                 | <b>Average</b> | <b>IQR</b> | <b>Consent (C) / Dissent (D)</b> | <b>% of important or very important (rank 4 or 5) scores</b> |
| Insurance driven (e.g. organized by Medicaid in the U.S.)              | 3.4            | 1.5        | D                                | 43.8                                                         |
| Third-party provider managed                                           | 3.2            | 2          | D                                | 43.8                                                         |
| <b>Dimension: Technology involved</b>                                  |                |            |                                  |                                                              |
| <b>Characteristics</b>                                                 | <b>Average</b> | <b>IQR</b> | <b>Consent (C) /</b>             | <b>% of important or</b>                                     |



|                                                                                    |                |            | <b>Dissent (D)</b>               | <b>very important (rank 4 or 5) scores</b>                   |
|------------------------------------------------------------------------------------|----------------|------------|----------------------------------|--------------------------------------------------------------|
| Electronic health records and documentation systems for patient data               | 4.7            | 0.25       | C                                | 93.8                                                         |
| Remote monitoring (e.g. wearables, sensors, Internet-of-Things technologies)       | 4.6            | 1          | C                                | 93.8                                                         |
| Medical devices for treatment or diagnostics (including medication dispensers)     | 4.4            | 1          | C                                | 87.5                                                         |
| Assistive technologies for healthcare professionals (e.g. dashboard, alert system) | 4.4            | 1          | C                                | 81.3                                                         |
| Data management tools                                                              | 4.3            | 1          | C                                | 87.5                                                         |
| Digital health tools for patients                                                  | 4.3            | 1          | C                                | 81.3                                                         |
| Tablet/Laptop/PC provided for patient/relative/caregiver use                       | 3.8            | 2          | D                                | 62.5                                                         |
| <b>Dimension: Reimbursement</b>                                                    |                |            |                                  |                                                              |
| <b>Characteristics</b>                                                             | <b>Average</b> | <b>IQR</b> | <b>Consent (C) / Dissent (D)</b> | <b>% of important or very important (rank 4 or 5) scores</b> |
| Health insurance coverage                                                          | 4.4            | 1          | C                                | 87.5                                                         |
| Integrated with inpatient reimbursement model                                      | 4.1            | 1          | C                                | 81.3                                                         |
| Bundled payments                                                                   | 3.8            | 2          | D                                | 50.0                                                         |
| Outpatient-based reimbursement model                                               | 3.0            | 2.25       | D                                | 50.0                                                         |
| Community-based reimbursement model                                                | 2.7            | 1.5        | D                                | 25.0                                                         |
| <b>Perspective: Target population</b>                                              |                |            |                                  |                                                              |

| Dimension: Patient selection criteria                                                |         |      |                           |                                                       |
|--------------------------------------------------------------------------------------|---------|------|---------------------------|-------------------------------------------------------|
| Characteristics                                                                      | Average | IQR  | Consent (C) / Dissent (D) | % of important or very important (rank 4 or 5) scores |
| Patient preference                                                                   | 4.7     | 0.25 | C                         | 93.8                                                  |
| Basic safety conditions at home (e.g. running water, hygiene)                        | 4.6     | 1    | C                         | 87.5                                                  |
| Informal caregiver willingness                                                       | 4.3     | 1    | C                         | 81.3                                                  |
| Adequate living conditions (e.g. distance to hospital, informal caregiver available) | 4.1     | 2    | D                         | 68.8                                                  |
| Social support                                                                       | 4.0     | 1.25 | D                         | 75.0                                                  |
| Common language between patient and HaH care team                                    | 3.8     | 1.25 | D                         | 68.8                                                  |
| Demographics                                                                         | 3.6     | 1.5  | D                         | 62.5                                                  |
| Technological readiness                                                              | 3.4     | 1    | C                         | 50.0                                                  |
| Informal caregiver skills                                                            | 3.4     | 1    | C                         | 43.8                                                  |
| Literacy level                                                                       | 3.1     | 1.25 | D                         | 43.8                                                  |
| Perspective: Training and education                                                  |         |      |                           |                                                       |
| Dimension: Training measurements                                                     |         |      |                           |                                                       |
| Characteristics                                                                      | Average | IQR  | Consent (C) / Dissent (D) | % of important or very important (rank 4 or 5) scores |
| Patient education                                                                    | 4.6     | 0.25 | C                         | 87.5                                                  |
| Informal caregiver training                                                          | 4.4     | 1    | C                         | 87.5                                                  |

Table 3: Results obtained in round 2.

### Round 3

#### Perspective: Outcome and quality metrics

| Dimension: Intended outcome / purpose                  |         |      |                           |                                                       |
|--------------------------------------------------------|---------|------|---------------------------|-------------------------------------------------------|
| Characteristics                                        | Average | IQR  | Consent (C) / Dissent (D) | % of important or very important (rank 4 or 5) scores |
| Improving patient safety                               | 4.6     | 0.25 | C                         | 87.5                                                  |
| Improving care outcomes                                | 4.5     | 1    | C                         | 87.5                                                  |
| Dimension: Quality / outcome metrics                   |         |      |                           |                                                       |
| Characteristics                                        | Average | IQR  | Consent (C) / Dissent (D) | % of important or very important (rank 4 or 5) scores |
| Health-related quality of life                         | 4.6     | 1    | C                         | 100                                                   |
| Cost effectiveness                                     | 4.6     | 1    | C                         | 93.8                                                  |
| Provider satisfaction                                  | 4.5     | 1    | C                         | 93.8                                                  |
| Services received (including answered telephone calls) | 4.4     | 1    | C                         | 93.8                                                  |
| Duration of the intervention                           | 4.4     | 1    | C                         | 87.5                                                  |
| Occurrence of infections                               | 4.4     | 1    | C                         | 81.3                                                  |
| Falls incidents                                        | 4.2     | 1.25 | D                         | 75.0                                                  |
| Prescription of drugs                                  | 3.9     | 2    | D                         | 62.5                                                  |
| Travel times saved                                     | 3.8     | 1.5  | D                         | 75.0                                                  |
| Reduction of workload for healthcare providers         | 3.8     | 2    | D                         | 62.5                                                  |
| Kilogram CO2 saved                                     | 3.4     | 1.5  | D                         | 50.0                                                  |
| Perspective: Persons and roles                         |         |      |                           |                                                       |

| Dimension: First point of care                                                                                                                                 |         |      |                           |                                                       |
|----------------------------------------------------------------------------------------------------------------------------------------------------------------|---------|------|---------------------------|-------------------------------------------------------|
| Characteristics                                                                                                                                                | Average | IQR  | Consent (C) / Dissent (D) | % of important or very important (rank 4 or 5) scores |
| Family doctor                                                                                                                                                  | 4.6     | 1    | C                         | 93.8                                                  |
| Day hospital                                                                                                                                                   | 4.3     | 1    | C                         | 81.3                                                  |
| Outpatient department                                                                                                                                          | 4.4     | 1    | C                         | 87.5                                                  |
| Nursing home                                                                                                                                                   | 4.1     | 2    | D                         | 68.8                                                  |
| Community healthcare staff (e.g. community specialty nurses like heart failure nurses)                                                                         | 3.9     | 1.25 | D                         | 75.0                                                  |
| Telephone triage                                                                                                                                               | 3.5     | 1    | C                         | 50.0                                                  |
| Ambulance service                                                                                                                                              | 3.5     | 2.25 | D                         | 43.8                                                  |
| Dimension: Person                                                                                                                                              |         |      |                           |                                                       |
| Characteristics                                                                                                                                                | Average | IQR  | Consent (C) / Dissent (D) | % of important or very important (rank 4 or 5) scores |
| Pharmacists                                                                                                                                                    | 4.7     | 1    | C                         | 100                                                   |
| Rehabilitation staff (Physiotherapists, occupational therapists...)                                                                                            | 4.4     | 1    | C                         | 100                                                   |
| Non-medical support services (e.g. administrative personnel, technology-related staff, managers, regulatory /legal officers, billers, transportation services) | 4.2     | 1    | C                         | 87.5                                                  |
| Social workers                                                                                                                                                 | 4.2     | 1    | C                         | 87.5                                                  |
| Imaging support                                                                                                                                                | 4.2     | 1    | C                         | 81.3                                                  |

|                                                                        |                |            |                                  |                                                              |
|------------------------------------------------------------------------|----------------|------------|----------------------------------|--------------------------------------------------------------|
| Laboratory support                                                     | 4.2            | 1          | C                                | 81.3                                                         |
| Informal caregivers, relatives, friends                                | 4.1            | 1.25       | D                                | 75.0                                                         |
| Dietician                                                              | 3.8            | 1.25       | D                                | 62.5                                                         |
| Paramedics                                                             | 3.7            | 2.25       | D                                | 62.5                                                         |
| Emergency department staff (e.g. in-hospital and extra-hospital)       | 3.6            | 2.25       | D                                | 56.3                                                         |
| Mental health support (psychologists, psychotherapists...)             | 3.4            | 1          | C                                | 50.0                                                         |
| <b>Perspective: Service delivery and care model</b>                    |                |            |                                  |                                                              |
| <b>Dimension: Care delivery approach</b>                               |                |            |                                  |                                                              |
| <b>Characteristics</b>                                                 | <b>Average</b> | <b>IQR</b> | <b>Consent (C) / Dissent (D)</b> | <b>% of important or very important (rank 4 or 5) scores</b> |
| Telemonitoring                                                         | 4.3            | 1          | C                                | 87.5                                                         |
| Telemedicine care                                                      | 4.3            | 1          | C                                | 87.5                                                         |
| <b>Dimension: Clinical applications</b>                                |                |            |                                  |                                                              |
| <b>Characteristics</b>                                                 | <b>Average</b> | <b>IQR</b> | <b>Consent (C) / Dissent (D)</b> | <b>% of important or very important (rank 4 or 5) scores</b> |
| Post acute care (e.g. physiotherapy at home or rehabilitation at home) | 3.4            | 3          | D                                | 56.3                                                         |
| Diagnostics                                                            | 3.1            | 2.25       | D                                | 31.3                                                         |
| Prevention (including prevention of worsening of a medical condition)  | 2.8            | 3          | D                                | 37.5                                                         |
| Continuous care for chronic conditions                                 | 2.4            | 3          | D                                | 31.3                                                         |
| <b>Dimension: Operational model</b>                                    |                |            |                                  |                                                              |
| <b>Characteristics</b>                                                 | <b>Average</b> | <b>IQR</b> | <b>Consent (C) /</b>             | <b>% of important or</b>                                     |

|                                                                                    |                |            |                                  |                                                              |
|------------------------------------------------------------------------------------|----------------|------------|----------------------------------|--------------------------------------------------------------|
|                                                                                    |                |            | <b>Dissent (D)</b>               | <b>very important (rank 4 or 5) scores</b>                   |
| Insurance driven (e.g. organized by Medicaid in the U.S.)                          | 3.6            | 1.25       | D                                | 56.3                                                         |
| Third-party provider managed                                                       | 3.4            | 1.5        | D                                | 56.3                                                         |
| <b>Dimension: Technology involved</b>                                              |                |            |                                  |                                                              |
| <b>Characteristics</b>                                                             | <b>Average</b> | <b>IQR</b> | <b>Consent (C) / Dissent (D)</b> | <b>% of important or very important (rank 4 or 5) scores</b> |
| Electronic health records and documentation systems for patient data               | 4.6            | 0          | C                                | 87.5                                                         |
| Remote monitoring (e.g. wearables, sensors, Internet-of-Things technologies)       | 4.3            | 1          | C                                | 87.5                                                         |
| Medical devices for treatment or diagnostics (including medication dispensers)     | 4.3            | 1          | C                                | 87.5                                                         |
| Data management tools                                                              | 4.3            | 1          | C                                | 87.5                                                         |
| Digital health tools for patients                                                  | 4.2            | 1.25       | D                                | 75.0                                                         |
| Assistive technologies for healthcare professionals (e.g. dashboard, alert system) | 4.1            | 2          | D                                | 68.8                                                         |
| Tablet/Laptop/PC provided for patient/relative/caregiver use                       | 3.9            | 2          | D                                | 68.8                                                         |
| <b>Dimension: Reimbursement</b>                                                    |                |            |                                  |                                                              |
| <b>Characteristics</b>                                                             | <b>Average</b> | <b>IQR</b> | <b>Consent (C) / Dissent (D)</b> | <b>% of important or very important (rank 4 or 5) scores</b> |

| Health insurance coverage                                                            | 4.4     | 1    | C                         | 81.3                                                  |
|--------------------------------------------------------------------------------------|---------|------|---------------------------|-------------------------------------------------------|
| Integrated with inpatient reimbursement model                                        | 4.3     | 1    | C                         | 81.3                                                  |
| Bundled payments                                                                     | 3.9     | 2    | D                         | 62.5                                                  |
| Outpatient-based reimbursement model                                                 | 3.1     | 2.25 | D                         | 37.5                                                  |
| Community-based reimbursement model                                                  | 2.8     | 1.25 | D                         | 25.0                                                  |
| <b>Perspective: Target population</b>                                                |         |      |                           |                                                       |
| <b>Dimension: Patient selection criteria</b>                                         |         |      |                           |                                                       |
| Characteristics                                                                      | Average | IQR  | Consent (C) / Dissent (D) | % of important or very important (rank 4 or 5) scores |
| Patient preference                                                                   | 4.8     | 0.25 | C                         | 100                                                   |
| Basic safety conditions at home (e.g. running water, hygiene)                        | 4.8     | 0    | C                         | 93.8                                                  |
| Adequate living conditions (e.g. distance to hospital, informal caregiver available) | 4.5     | 1    | C                         | 87.5                                                  |
| Informal caregiver willingness                                                       | 4.4     | 1    | C                         | 87.5                                                  |
| Demographics                                                                         | 4.3     | 1    | C                         | 87.5                                                  |
| Social support                                                                       | 4.3     | 1    | C                         | 81.3                                                  |
| Common language between patient and HaH care team                                    | 4.0     | 1.25 | D                         | 75.0                                                  |
| Informal caregiver skills                                                            | 3.9     | 2    | D                         | 68.8                                                  |
| Literacy level                                                                       | 3.7     | 0.25 | C                         | 75.0                                                  |
| Technological readiness                                                              | 3.6     | 1    | C                         | 62.5                                                  |
| <b>Perspective: Training and education</b>                                           |         |      |                           |                                                       |
| <b>Dimension: Training measurements</b>                                              |         |      |                           |                                                       |
| Characteristics                                                                      | Average | IQR  | Consent (C) /             | % of important or                                     |

|                             |     |   | <b>Dissent (D)</b> | <b>very important (rank 4 or 5) scores</b> |
|-----------------------------|-----|---|--------------------|--------------------------------------------|
| Patient education           | 4.6 | 1 | C                  | 93.8                                       |
| Informal caregiver training | 4.4 | 1 | C                  | 87.5                                       |

Table 4: Results obtained in round 3.



## Appendix 4: Summary of CREDES Reporting Recommendations

| Recommendation         | Item # | Explanation                                                                                                                                                                                                                                                                                                                                                                                                                   | Reported on                                                                                                                                                                                                                                                                          |
|------------------------|--------|-------------------------------------------------------------------------------------------------------------------------------------------------------------------------------------------------------------------------------------------------------------------------------------------------------------------------------------------------------------------------------------------------------------------------------|--------------------------------------------------------------------------------------------------------------------------------------------------------------------------------------------------------------------------------------------------------------------------------------|
| Purpose and rationale  | 8      | The purpose of the study should be clearly defined and demonstrate the appropriateness of the use of the Delphi technique as a method to achieve the research aim. A rationale for the choice of the Delphi technique as the most suitable method needs to be provided.                                                                                                                                                       | The purpose is reported in section "Introduction". Appropriateness and rationale could be found in section "Methods"                                                                                                                                                                 |
| Expert panel           | 9      | Criteria for the selection of participants and transparent information on recruitment of the expert panel, sociodemographic details including information on expertise regarding the topic in question, (non)response, and response rates over the ongoing iterations should be reported.                                                                                                                                     | Panel information is provided in section "Participants". Sociodemographic data and response rates are reported in section "Characteristics of the panel".                                                                                                                            |
| Description of methods | 10     | The methods employed need to be comprehensible; this includes information on preparatory steps, piloting of material and survey instruments, design of the survey instrument(s), the number and design of survey rounds, methods of data analysis, processing and synthesis of participants' responses to inform the subsequent survey round, and methodological decisions taken by the research team throughout the process. | Preparatory steps are reported in section "Preparatory phase". The number of rounds could be found in section "Delphi rounds". Detailed information on methods of data analysis is provided in section "Analysis". Methodological decisions are reported in section "Delphi rounds". |
| Procedure              | 11     | Flowchart To illustrate the stages of the Delphi process, including preparatory phase, the actual "Delphi rounds," interim steps of data processing and analysis, and concluding steps.                                                                                                                                                                                                                                       | Flowchart could be found in section "Incorporation of new items based on responses to the open ended questions" (Figure 1).                                                                                                                                                          |
| Definition and         | 12     | It needs to be comprehensible                                                                                                                                                                                                                                                                                                                                                                                                 | Consensus definition                                                                                                                                                                                                                                                                 |

|                               |    |                                                                                                                                                                                                                                                                                                                                                                |                                                                                                                                                                                                                                                                                                                                                                |
|-------------------------------|----|----------------------------------------------------------------------------------------------------------------------------------------------------------------------------------------------------------------------------------------------------------------------------------------------------------------------------------------------------------------|----------------------------------------------------------------------------------------------------------------------------------------------------------------------------------------------------------------------------------------------------------------------------------------------------------------------------------------------------------------|
| attainment of consensus       |    | threader how consensus was achieved throughout the process, including strategies to deal with non consensus.                                                                                                                                                                                                                                                   | and strategies to deal with non consensus are reported in section “Delphi rounds”.                                                                                                                                                                                                                                                                             |
| Results                       | 13 | Reporting of results for each round separately is highly advisable to make the evolving of consensus over the rounds transparent. This includes figures showing the average group response, changes between rounds, as well as any modifications of the survey instrument such a deletion, addition, or modification of survey items based on previous rounds. | Results are presented in the section “Results”. Evolving of consensus over the rounds is provided in appendix 2. Figure 1 shows response rates, changes between rounds, and modifications of the survey instrument. A description of the Delphi process could be found in section “Incorporation of new items based on responses to the open ended questions”. |
| Discussion of limitation      | 14 | Reporting should Include critical reflection of potential limitations and their impact of the resulting guidance.                                                                                                                                                                                                                                              | Limitations were identified in section “Strengths and Limitations of this study”,                                                                                                                                                                                                                                                                              |
| Adequacy of conclusions       | 15 | The conclusions should adequately reflect the outcomes of the Delphi study with a view to the scope and applicability of the resulting practice guidance.                                                                                                                                                                                                      | Conclusions are presented in section “Conclusions”.                                                                                                                                                                                                                                                                                                            |
| Publication and dissemination | 16 | The resulting definition of HaH should be clearly identifiable from the publication.                                                                                                                                                                                                                                                                           | The proposed definition of HaH care is presented in section “Definition of HaH care”.                                                                                                                                                                                                                                                                          |
